# Supplementary material for: Partial nitrification/ANAMMOX (PN/A) membrane aerated biofilm reactor (MABR) under a low C/N ratio and metagenomics identification
Source: Royal Society of Chemistry journal article supplement (doi:10.1039/d2ew00749e), 2022-11-28
Supplement: d2ew00749e1.xlsx [file d2ew00749e1.xlsx]

## Sheet: kegg.kegg_pathway_level2.covera
KEGG_pathway level 2	KEGG_pathway level 1	C
Amino acid metabolism	Metabolism	0.0556316
Biosynthesis of other secondary metabolites	Metabolism	0.0056107
Carbohydrate metabolism	Metabolism	0.0508027
Cell growth and death	Cellular Processes	2.96852e-05
Cell motility	Cellular Processes	0.00589972
Cellular community - prokaryotes	Cellular Processes	0.0159941
Energy metabolism	Metabolism	0.0325694
Folding, sorting and degradation	Genetic Information Processing	0.0119005
Global and overview maps	Metabolism	0.162939
Glycan biosynthesis and metabolism	Metabolism	0.00943741
Lipid metabolism	Metabolism	0.0150071
Membrane transport	Environmental Information Processing	0.0281793
Metabolism of cofactors and vitamins	Metabolism	0.0297264
Metabolism of other amino acids	Metabolism	0.0142074
Metabolism of terpenoids and polyketides	Metabolism	0.00758786
Nucleotide metabolism	Metabolism	0.0245063
Replication and repair	Genetic Information Processing	0.015173
Signal transduction	Environmental Information Processing	0.0179059
Transcription	Genetic Information Processing	0.00238471
Translation	Genetic Information Processing	0.0221455
Transport and catabolism	Cellular Processes	1.97901e-05
Xenobiotics biodegradation and metabolism	Metabolism	0.0098396
