# Supplementary material for: Partial nitrification/ANAMMOX (PN/A) membrane aerated biofilm reactor (MABR) under a low C/N ratio and metagenomics identification
Source: Royal Society of Chemistry journal article supplement (doi:10.1039/d2ew00749e), 2022-11-28
Supplement: d2ew00749e2.xlsx [file d2ew00749e2.xlsx]

## Sheet: kegg.kegg_pathway_level3.covera
kegg_pathway	kegg_pathway_id	KEGG_pathway level 2	KEGG_pathway level 1	relative abundance
Glycolysis / Gluconeogenesis	ko00010	Carbohydrate metabolism	Metabolism	0.0100692
Citrate cycle (TCA cycle)	ko00020	Carbohydrate metabolism	Metabolism	0.00946338
Pentose phosphate pathway	ko00030	Carbohydrate metabolism	Metabolism	0.0048628
Pentose and glucuronate interconversions	ko00040	Carbohydrate metabolism	Metabolism	0.00195365
Fructose and mannose metabolism	ko00051	Carbohydrate metabolism	Metabolism	0.00311076
Galactose metabolism	ko00052	Carbohydrate metabolism	Metabolism	0.00227834
Ascorbate and aldarate metabolism	ko00053	Carbohydrate metabolism	Metabolism	0.00132285
Fatty acid biosynthesis	ko00061	Lipid metabolism	Metabolism	0.00521552
Fatty acid elongation	ko00062	Lipid metabolism	Metabolism	3.29835e-06
Fatty acid degradation	ko00071	Lipid metabolism	Metabolism	0.0051947
Synthesis and degradation of ketone bodies	ko00072	Lipid metabolism	Metabolism	0.00169164
Steroid biosynthesis	ko00100	Lipid metabolism	Metabolism	1.71102e-05
Secondary bile acid biosynthesis	ko00121	Lipid metabolism	Metabolism	1.9584e-05
Ubiquinone and other terpenoid-quinone biosynthesis	ko00130	Metabolism of cofactors and vitamins	Metabolism	0.00253973
Oxidative phosphorylation	ko00190	Energy metabolism	Metabolism	0.01326
Photosynthesis	ko00195	Energy metabolism	Metabolism	1.23688e-05
Arginine biosynthesis	ko00220	Amino acid metabolism	Metabolism	0.00423446
Purine metabolism	ko00230	Nucleotide metabolism	Metabolism	0.0181677
Caffeine metabolism	ko00232	Biosynthesis of other secondary metabolites	Metabolism	6.18441e-07
Pyrimidine metabolism	ko00240	Nucleotide metabolism	Metabolism	0.0144736
Alanine, aspartate and glutamate metabolism	ko00250	Amino acid metabolism	Metabolism	0.00860478
Tetracycline biosynthesis	ko00253	Metabolism of terpenoids and polyketides	Metabolism	2.92729e-05
Glycine, serine and threonine metabolism	ko00260	Amino acid metabolism	Metabolism	0.00894204
Monobactam biosynthesis	ko00261	Biosynthesis of other secondary metabolites	Metabolism	0.00191263
Cysteine and methionine metabolism	ko00270	Amino acid metabolism	Metabolism	0.00811353
Valine, leucine and isoleucine degradation	ko00280	Amino acid metabolism	Metabolism	0.00868147
Geraniol degradation	ko00281	Metabolism of terpenoids and polyketides	Metabolism	0.00140262
Valine, leucine and isoleucine biosynthesis	ko00290	Amino acid metabolism	Metabolism	0.00370405
Lysine biosynthesis	ko00300	Amino acid metabolism	Metabolism	0.00347852
Lysine degradation	ko00310	Amino acid metabolism	Metabolism	0.00404337
Penicillin and cephalosporin biosynthesis	ko00311	Biosynthesis of other secondary metabolites	Metabolism	0.000203467
Arginine and proline metabolism	ko00330	Amino acid metabolism	Metabolism	0.00526005
Carbapenem biosynthesis	ko00332	Biosynthesis of other secondary metabolites	Metabolism	0.00033066
Histidine metabolism	ko00340	Amino acid metabolism	Metabolism	0.00389948
Tyrosine metabolism	ko00350	Amino acid metabolism	Metabolism	0.00311323
Phenylalanine metabolism	ko00360	Amino acid metabolism	Metabolism	0.00514667
Chlorocyclohexane and chlorobenzene degradation	ko00361	Xenobiotics biodegradation and metabolism	Metabolism	0.000646477
Benzoate degradation	ko00362	Xenobiotics biodegradation and metabolism	Metabolism	0.0049432
Fluorobenzoate degradation	ko00364	Xenobiotics biodegradation and metabolism	Metabolism	0.000313962
Furfural degradation	ko00365	Xenobiotics biodegradation and metabolism	Metabolism	1.56672e-05
Tryptophan metabolism	ko00380	Amino acid metabolism	Metabolism	0.00493598
Phenylalanine, tyrosine and tryptophan biosynthesis	ko00400	Amino acid metabolism	Metabolism	0.00505287
Novobiocin biosynthesis	ko00401	Biosynthesis of other secondary metabolites	Metabolism	0.00100991
beta-Alanine metabolism	ko00410	Metabolism of other amino acids	Metabolism	0.00287822
Taurine and hypotaurine metabolism	ko00430	Metabolism of other amino acids	Metabolism	0.00132202
Phosphonate and phosphinate metabolism	ko00440	Metabolism of other amino acids	Metabolism	0.00037024
Selenocompound metabolism	ko00450	Metabolism of other amino acids	Metabolism	0.00342204
Cyanoamino acid metabolism	ko00460	Metabolism of other amino acids	Metabolism	0.00146942
D-Glutamine and D-glutamate metabolism	ko00471	Metabolism of other amino acids	Metabolism	0.00110206
D-Arginine and D-ornithine metabolism	ko00472	Metabolism of other amino acids	Metabolism	0.000118535
D-Alanine metabolism	ko00473	Metabolism of other amino acids	Metabolism	0.000780266
Glutathione metabolism	ko00480	Metabolism of other amino acids	Metabolism	0.00386917
Starch and sucrose metabolism	ko00500	Carbohydrate metabolism	Metabolism	0.00437588
N-Glycan biosynthesis	ko00510	Glycan biosynthesis and metabolism	Metabolism	4.12294e-07
Other glycan degradation	ko00511	Glycan biosynthesis and metabolism	Metabolism	0.000647301
Various types of N-glycan biosynthesis	ko00513	Glycan biosynthesis and metabolism	Metabolism	4.12294e-07
Amino sugar and nucleotide sugar metabolism	ko00520	Carbohydrate metabolism	Metabolism	0.0073815
Streptomycin biosynthesis	ko00521	Biosynthesis of other secondary metabolites	Metabolism	0.00214681
Polyketide sugar unit biosynthesis	ko00523	Metabolism of terpenoids and polyketides	Metabolism	0.0013414
Neomycin, kanamycin and gentamicin biosynthesis	ko00524	Biosynthesis of other secondary metabolites	Metabolism	8.03973e-06
Acarbose and validamycin biosynthesis	ko00525	Biosynthesis of other secondary metabolites	Metabolism	0.000852212
Lipopolysaccharide biosynthesis	ko00540	Glycan biosynthesis and metabolism	Metabolism	0.00340266
Peptidoglycan biosynthesis	ko00550	Glycan biosynthesis and metabolism	Metabolism	0.00538703
Glycerolipid metabolism	ko00561	Lipid metabolism	Metabolism	0.0021297
Inositol phosphate metabolism	ko00562	Carbohydrate metabolism	Metabolism	0.00104764
Glycerophospholipid metabolism	ko00564	Lipid metabolism	Metabolism	0.00335525
Ether lipid metabolism	ko00565	Lipid metabolism	Metabolism	0.000111319
Arachidonic acid metabolism	ko00590	Lipid metabolism	Metabolism	0.000368385
Linoleic acid metabolism	ko00591	Lipid metabolism	Metabolism	4.86507e-05
alpha-Linolenic acid metabolism	ko00592	Lipid metabolism	Metabolism	0.000299325
Sphingolipid metabolism	ko00600	Lipid metabolism	Metabolism	0.000436825
Pyruvate metabolism	ko00620	Carbohydrate metabolism	Metabolism	0.0125113
Dioxin degradation	ko00621	Xenobiotics biodegradation and metabolism	Metabolism	0.000284895
Xylene degradation	ko00622	Xenobiotics biodegradation and metabolism	Metabolism	0.000542991
Toluene degradation	ko00623	Xenobiotics biodegradation and metabolism	Metabolism	0.000549176
Polycyclic aromatic hydrocarbon degradation	ko00624	Xenobiotics biodegradation and metabolism	Metabolism	0.000292729
Chloroalkane and chloroalkene degradation	ko00625	Xenobiotics biodegradation and metabolism	Metabolism	0.0012509
Naphthalene degradation	ko00626	Xenobiotics biodegradation and metabolism	Metabolism	0.000432496
Aminobenzoate degradation	ko00627	Xenobiotics biodegradation and metabolism	Metabolism	0.00186254
Glyoxylate and dicarboxylate metabolism	ko00630	Carbohydrate metabolism	Metabolism	0.0113834
Nitrotoluene degradation	ko00633	Xenobiotics biodegradation and metabolism	Metabolism	0.000930754
Propanoate metabolism	ko00640	Carbohydrate metabolism	Metabolism	0.00922116
Ethylbenzene degradation	ko00642	Xenobiotics biodegradation and metabolism	Metabolism	8.10158e-05
Styrene degradation	ko00643	Xenobiotics biodegradation and metabolism	Metabolism	0.000987856
Butanoate metabolism	ko00650	Carbohydrate metabolism	Metabolism	0.00843141
C5-Branched dibasic acid metabolism	ko00660	Carbohydrate metabolism	Metabolism	0.00226968
One carbon pool by folate	ko00670	Metabolism of cofactors and vitamins	Metabolism	0.00400956
Methane metabolism	ko00680	Energy metabolism	Metabolism	0.00793831
Carbon fixation in photosynthetic organisms	ko00710	Energy metabolism	Metabolism	0.00073512
Carbon fixation pathways in prokaryotes	ko00720	Energy metabolism	Metabolism	0.000379929
Thiamine metabolism	ko00730	Metabolism of cofactors and vitamins	Metabolism	0.00167123
Riboflavin metabolism	ko00740	Metabolism of cofactors and vitamins	Metabolism	0.00118122
Vitamin B6 metabolism	ko00750	Metabolism of cofactors and vitamins	Metabolism	0.00128244
Nicotinate and nicotinamide metabolism	ko00760	Metabolism of cofactors and vitamins	Metabolism	0.00391452
Pantothenate and CoA biosynthesis	ko00770	Metabolism of cofactors and vitamins	Metabolism	0.00389226
Biotin metabolism	ko00780	Metabolism of cofactors and vitamins	Metabolism	0.00280607
Lipoic acid metabolism	ko00785	Metabolism of cofactors and vitamins	Metabolism	0.000534127
Folate biosynthesis	ko00790	Metabolism of cofactors and vitamins	Metabolism	0.00302273
Atrazine degradation	ko00791	Xenobiotics biodegradation and metabolism	Metabolism	0.000151518
Porphyrin and chlorophyll metabolism	ko00860	Metabolism of cofactors and vitamins	Metabolism	0.00503617
Terpenoid backbone biosynthesis	ko00900	Metabolism of terpenoids and polyketides	Metabolism	0.0037762
Limonene and pinene degradation	ko00903	Metabolism of terpenoids and polyketides	Metabolism	0.00105753
Carotenoid biosynthesis	ko00906	Metabolism of terpenoids and polyketides	Metabolism	0.000396627
Sesquiterpenoid and triterpenoid biosynthesis	ko00909	Metabolism of terpenoids and polyketides	Metabolism	3.11282e-05
Nitrogen metabolism	ko00910	Energy metabolism	Metabolism	0.00612153
Sulfur metabolism	ko00920	Energy metabolism	Metabolism	0.00447792
Caprolactam degradation	ko00930	Xenobiotics biodegradation and metabolism	Metabolism	0.000760682
Aminoacyl-tRNA biosynthesis	ko00970	Translation	Genetic Information Processing	0.0101094
Steroid degradation	ko00984	Xenobiotics biodegradation and metabolism	Metabolism	0.000113999
Biosynthesis of unsaturated fatty acids	ko01040	Lipid metabolism	Metabolism	0.00143066
Biosynthesis of ansamycins	ko01051	Metabolism of terpenoids and polyketides	Metabolism	2.06147e-06
Type I polyketide structures	ko01052	Metabolism of terpenoids and polyketides	Metabolism	6.18441e-07
Biosynthesis of siderophore group nonribosomal peptides	ko01053	Metabolism of terpenoids and polyketides	Metabolism	2.02024e-05
Nonribosomal peptide structures	ko01054	Metabolism of terpenoids and polyketides	Metabolism	6.84408e-05
Biosynthesis of vancomycin group antibiotics	ko01055	Metabolism of terpenoids and polyketides	Metabolism	5.46289e-05
Biosynthesis of type II polyketide backbone	ko01056	Metabolism of terpenoids and polyketides	Metabolism	4.12294e-07
Biosynthesis of type II polyketide products	ko01057	Metabolism of terpenoids and polyketides	Metabolism	4.32909e-06
Metabolic pathways	ko01100	Global and overview maps	Metabolism	0.151025
Biosynthesis of secondary metabolites	ko01110	Global and overview maps	Metabolism	0.0651831
Microbial metabolism in diverse environments	ko01120	Global and overview maps	Metabolism	0.0529142
Biosynthesis of antibiotics	ko01130	Global and overview maps	Metabolism	0.0511383
Carbon metabolism	ko01200	Global and overview maps	Metabolism	0.0319239
2-Oxocarboxylic acid metabolism	ko01210	Global and overview maps	Metabolism	0.00701704
Fatty acid metabolism	ko01212	Global and overview maps	Metabolism	0.0080655
Degradation of aromatic compounds	ko01220	Global and overview maps	Metabolism	0.00257354
Biosynthesis of amino acids	ko01230	Global and overview maps	Metabolism	0.0288043
ABC transporters	ko02010	Membrane transport	Environmental Information Processing	0.0208126
Two-component system	ko02020	Signal transduction	Environmental Information Processing	0.0179055
Quorum sensing	ko02024	Cellular community - prokaryotes	Cellular Processes	0.0159941
Bacterial chemotaxis	ko02030	Cell motility	Cellular Processes	0.00287245
Flagellar assembly	ko02040	Cell motility	Cellular Processes	0.00375105
Phosphotransferase system (PTS)	ko02060	Membrane transport	Environmental Information Processing	0.00055804
Ribosome biogenesis in eukaryotes	ko03008	Translation	Genetic Information Processing	3.91679e-06
Ribosome	ko03010	Translation	Genetic Information Processing	0.0120266
RNA transport	ko03013	Translation	Genetic Information Processing	4.94753e-06
mRNA surveillance pathway	ko03015	Translation	Genetic Information Processing	6.18441e-07
RNA degradation	ko03018	Folding, sorting and degradation	Genetic Information Processing	0.00575768
RNA polymerase	ko03020	Transcription	Genetic Information Processing	0.00237997
DNA replication	ko03030	Replication and repair	Genetic Information Processing	0.00514955
Spliceosome	ko03040	Transcription	Genetic Information Processing	4.74138e-06
Proteasome	ko03050	Folding, sorting and degradation	Genetic Information Processing	1.62856e-05
Protein export	ko03060	Folding, sorting and degradation	Genetic Information Processing	0.00431424
Bacterial secretion system	ko03070	Membrane transport	Environmental Information Processing	0.00683604
Base excision repair	ko03410	Replication and repair	Genetic Information Processing	0.00309653
Nucleotide excision repair	ko03420	Replication and repair	Genetic Information Processing	0.00430785
Mismatch repair	ko03430	Replication and repair	Genetic Information Processing	0.00596301
Homologous recombination	ko03440	Replication and repair	Genetic Information Processing	0.00698364
Non-homologous end-joining	ko03450	Replication and repair	Genetic Information Processing	8.34895e-05
Phosphatidylinositol signaling system	ko04070	Signal transduction	Environmental Information Processing	4.12294e-07
Cell cycle - Caulobacter	ko04112	Cell growth and death	Cellular Processes	2.96852e-05
Ubiquitin mediated proteolysis	ko04120	Folding, sorting and degradation	Genetic Information Processing	3.5045e-06
Sulfur relay system	ko04122	Folding, sorting and degradation	Genetic Information Processing	0.00180296
Protein processing in endoplasmic reticulum	ko04141	Folding, sorting and degradation	Genetic Information Processing	7.62744e-06
Endocytosis	ko04144	Transport and catabolism	Cellular Processes	8.03973e-06
Phagosome	ko04145	Transport and catabolism	Cellular Processes	7.62744e-06
Peroxisome	ko04146	Transport and catabolism	Cellular Processes	8.86432e-06
